1  
2  
3  
4  
5  
6  
7  
8  
9  
10  
11  
12  
13  
14  
15  
16  
17  
18  
19  
20  
21  
22  
23  
24  
25

Measures of repetition suppression in the Fusiform Face Area are inflated by co-occurring effects of statistically learned visual associations

Sophie-Marie Rostalski <sup>a</sup>, Catarina Amado <sup>b</sup>, Gyula Kovács <sup>a,+++</sup>, Daniel Feuerriegel <sup>c,+++</sup>

<sup>a</sup> *Institute of Psychology, Friedrich Schiller University Jena, Jena, Germany*

<sup>b</sup> *Experimental Cognitive Science, Eberhard Karls Universität Tübingen, Tübingen, Germany*

<sup>c</sup> *Melbourne School of Psychological Sciences, The University of Melbourne, Melbourne, Australia*

+++ *These two authors contributed to the publication equally as senior authors*

**Corresponding author:** Sophie-Marie Rostalski, Institute of Psychology, Friedrich Schiller University Jena, Germany. E-mail address: [sophie-marie.rostalski@uni-jena.de](mailto:sophie-marie.rostalski@uni-jena.de)

**Conflicts of interest:** The authors declare no competing financial interests.

26

27

## Abstract

28 Repeated presentation of a stimulus leads to reductions in measures of neural responses.

29 This phenomenon, termed repetition suppression (RS), has recently been conceptualized

30 using models based on predictive coding, which describe RS as due to expectations that

31 are weighted toward recently-seen stimuli. To evaluate these models, researchers have

32 manipulated the likelihood of stimulus repetition within experiments. They have reported

33 findings that are inconsistent across hemodynamic and electrophysiological measures,

34 and difficult to interpret as clear support or refutation of predictive coding models. We

35 instead investigated a different type of expectation effect that is apparent in stimulus

36 repetition experiments: the difference in one's ability to predict the identity of repeated,

37 compared to unrepeated, stimuli. In previous experiments that presented pairs of

38 repeated or alternating images, once participants had seen the first stimulus image in a

39 pair, they could form specific expectations about the repeated stimulus image. However

40 they could not form such expectations for the alternating image, which was often

41 randomly chosen from a large stimulus set. To assess the contribution of stimulus

42 predictability effects to previously observed RS, we measured BOLD signals while

43 presenting pairs of repeated and alternating faces. This was done in contexts whereby

44 stimuli in alternating trials were either i.) predictable through statistically learned

45 associations between pairs of stimuli or ii.) chosen randomly and therefore unpredictable.

46 We found that RS in the right FFA was much larger in trials with unpredictable compared

47 to predictable alternating faces. This was primarily due to unpredictable alternating

48 stimuli evoking larger BOLD signals than predictable alternating stimuli. We show that

49 imbalances in stimulus predictability across repeated and alternating trials can greatly

50 inflate measures of RS, or even mimic RS effects. Our findings also indicate that stimulus-

51 specific expectations, as described by predictive coding models, may account for a sizeable

52 portion of observed RS effects.

53 Keywords: Repetition suppression, expectation, prediction, fMRI

54

55

## 1. Introduction

56 Repeated presentation of a stimulus leads to reduced measures of neural responses, as  
57 observed using a variety of electrophysiological and neuroimaging techniques (for a  
58 review see Grill-Spector et al., 2006). Such effects are commonly known as repetition  
59 suppression (RS) or adaptation. Similarly, the correct and fulfilled expectation of a  
60 forthcoming stimulus also leads to reduced responses when compared to unexpected or  
61 surprising stimuli, for several stimulus categories and measures (known as expectation  
62 suppression, ES; for a review see Summerfield & Egner, 2009).

63 Explanations of repetition- as well as expectation-related phenomena under the  
64 framework of predictive coding (Rao & Ballard, 1999) have gained traction in recent years.  
65 This is because, in contrast to several other neurobiologically-plausible models of RS (for  
66 review see Grill-Spector et al., 2006), predictive coding models describe mechanisms that  
67 can potentially account for observed RS effects, and also how RS might be modulated by  
68 processes related to perceptual expectations and attention (e.g., Eger, 2004; Murray &  
69 Wojciulik, 2004). Predictive coding models conceptualize RS as a reduction of prediction  
70 error signals, due to perceptual expectations that are weighted toward recently-  
71 encountered stimuli (e.g., Friston, 2005; Grotheer & Kovács, 2015; Aukstulewicz &  
72 Friston, 2016). Factors such as attention are hypothesized to modulate the precision of  
73 sensory predictions (Feldman & Friston, 2010), which in turn influence the extent of  
74 observed RS. Predictive coding models describe different mechanisms than those in  
75 recently-formulated local circuit models of RS (Dhruv et al., 2011; Kaliukhovich & Vogels,  
76 2016; Solomon & Kohn, 2014). However, the notion of precision in predictive coding  
77 models allows us to test hypotheses about how attention and perceptual expectations  
78 affect RS, while specific hypotheses have (to our knowledge) not yet been derived for the  
79 abovementioned local circuit models.

80 Summerfield et al. (2008) was the first to provide empirical support for the  
81 predictive coding model by showing that neuroimaging measures of RS can be modulated

82 by contextual factors, such as the probability of stimulus repetition. They presented pairs  
83 of faces in each trial and reported that BOLD signal differences between repeated and  
84 unrepeated stimuli (i.e., repetition effects) were larger in blocks with high (75%),  
85 compared to blocks with low (25%) repetition probability. This interaction involving  
86 repetition probability was replicated several times using faces (for a review see Grotheer et  
87 al., 2014), and also for other stimulus categories such as letters (Grotheer & Kovács, 2014)  
88 and other non-face objects (Kronbichler et al., 2018; Mayrhauser et al., 2014). Notably, this  
89 interaction has mostly been reported in studies using fMRI; when using  
90 electrophysiological measures researchers have found separable, non-interacting  
91 repetition and expectation effects (Feuerriegel et al., 2018a; Kaliukhovich & Vogels, 2014;  
92 Todorovic & de Lange, 2012; Vinken et al., 2018), with the exception of Summerfield et al.  
93 (2011, but see Feuerriegel et al., 2018a for an alternative explanation of this result).

94 When interpreting these findings, it is important to differentiate the neural  
95 mechanisms of RS from how RS is typically measured within an experiment (as a  
96 difference between a comparable repeated and unrepeated stimulus condition). In such  
97 experiments, any effect that will influence repeated and unrepeated stimulus-evoked  
98 responses in different ways will also contribute to the measured magnitude of RS, even if  
99 that effect is unrelated to the underlying processes responsible for RS (reviewed in  
100 Feuerriegel, 2016). In Summerfield et al. (2008) and similar experiments, participants  
101 could learn to expect stimulus repetitions in the 75% repetition blocks, whereby in the  
102 same block unrepeated stimulus trials were relatively rare and surprising. Conversely, in  
103 the 25% repetition blocks the unrepeated stimuli were instead expected, and the repeated  
104 stimuli relatively surprising. Accordingly, the observed RS by expectation interaction  
105 could actually be produced by additive effects of genuine RS and a distinct expectation  
106 related suppression effect (ES; Kaliukhovich & Vogels, 2011; Larsson & Smith, 2012), with  
107 expectations suppressing responses to either repeated or unrepeated stimuli in different  
108 block types.

109 More recent studies have used “cue” stimuli, whereby the first stimulus in each trial  
110 signals the probability of stimulus repetition, in order to distinguish between additive and

111 interactive effects of ES and RS. Todorovic and de Lange (2012) presented pairs of auditory  
112 tones, which could either repeat or change within a trial. The pitch of the first tone  
113 predicted stimulus alternation or repetition with 75% probability. They reported that RS  
114 and ES, as indexed by magnetoencephalography (MEG), were separable and occurred at  
115 distinct time windows. In a similar design using face stimuli Grotheer and Kovács (2015)  
116 reported that effects RS and ES on BOLD signals did not interact, and were partly  
117 dissociable in the time course of their effects on the hemodynamic response. In a follow-  
118 up study Amado and colleagues (2016) added a ‘neutral’ condition, in which expectations  
119 were not weighted toward either repeated or alternating stimuli, to separately quantify  
120 effects of fulfilled expectations and surprise. They found that surprise had a much larger  
121 effect on BOLD signals than fulfilled expectations, and that this effect of surprise was  
122 apparent for alternating (but not repeated) stimulus conditions (see also e.g., Figure 2 in  
123 De Gardelle et al., 2013; Figure 2 in Larsson & Smith, 2012). This suggests that, instead of  
124 ES modulating repetition effects, RS might in fact inhibit surprise-related response  
125 enhancements, as found in a recent EEG study (Feuerriegel et al., 2018b). These results,  
126 along with the inconsistency of findings across fMRI and electrophysiological recording  
127 methods, do not provide clear evidence that expectations modulate RS in the way  
128 previously specified by predictive coding models.

129 Besides expectations relating to stimulus repetition probability, there is another  
130 type of expectation that is prevalent in studies of RS, and relevant for evaluating  
131 predictive coding models of repetition effects. There is evidence from single-cell  
132 recordings of non-human primates (Meyer & Olson, 2011) as well as human  
133 electrophysiological and neuroimaging experiments (Turk-Browne et al., 2009; Hall et al.,  
134 2018; Pajani et al., 2017; Feuerriegel et al., 2018a) indicating that associations are formed  
135 between images that are shown temporally close together, and this association modulates  
136 neural responses. The proposed underlying mechanism is that the observers learn about  
137 the transitional statistics or rules of the stimulation sequences, as humans do from early  
138 childhood onwards to learn about their environment (Fiser & Aslin, 2002; Romberg &  
139 Saffran, 2011). As a seminal example, Meyer and Olson (2011) trained macaques to  
140 associate originally unrelated images by presenting the same stimulus pairs over a

141 prolonged time period. The animals learned that one leading image was always followed  
142 by a specific trailing image. In a subsequent session, single-neuron activity was recorded  
143 from inferotemporal cortex (IT) while the animals viewed stimulus pairs which were  
144 either previously associated or randomly paired. IT neurons exhibited higher firing rates  
145 following stimuli which violated previously learned transitional rules, compared to those  
146 that were associated with the previous image.

147 This type of statistically learned expectation is relevant to a large number of  
148 stimulus repetition designs that have been used in the past. In these designs, participants  
149 are presented with two stimuli in each trial, which may be of the same or different  
150 identities. In repetition trials the identity of the second stimulus can be predicted after  
151 seeing the first stimulus in the trial, however the alternating (unrepeated) stimulus is  
152 often randomly-chosen from a set of multiple stimuli, and is very difficult to predict with  
153 any certainty (Feuerriegel, 2016). This imbalance in predictability across repetition and  
154 alternation trials could theoretically inflate the magnitude of, or even produce, many  
155 previously observed RS effects. Pajani et al. (2017) investigated this using a design that  
156 manipulated the predictability of the alternating stimuli. They presented stimuli in  
157 repetition blocks, composed of 75% repetition and 25% alternation trials, and alternation  
158 blocks, with only a 25% portion of repetition trials. Crucially, in a third block type 25% of  
159 trials were repetitions and 75% were predictable alternations, whereby the second  
160 stimulus was repeatedly paired with the first stimulus during a prior training session.  
161 They observed large differences in the magnitude of repetition effects, apparently due to  
162 reductions in BOLD signals for predictable compared to unpredictable alternating faces.  
163 Further evidence for predictability effects came from a recent EEG study (Feuerriegel et  
164 al., 2018a), who used a similar blocked design with predictable and unpredictable  
165 alternating faces. In the so-called “AB” blocks in that experiment the second stimulus in  
166 each trial could either be the same image as the first (repetition trials), or a specific same-  
167 sex face (predictable alternation trials). In the “AX” blocks, however, the second stimulus  
168 could either be a repetition of the first one, or a same-gender face, selected randomly from  
169 a set of 23 stimuli (unpredictable alternation trials). Differences in event-related potential  
170 (ERP) repetition effect magnitudes across AB and AX blocks were found during multiple

171 time windows post stimulus onset. Importantly, these differences in observed repetition  
172 effects were due to differences in ERP responses to alternating stimuli across block types,  
173 and no differences across AB and AX blocks were found for repeating stimuli.

174 Critically, this study did not equate the relative novelty of AB and AX alternating  
175 stimuli, as each individual face identity was presented many more times in the AB  
176 compared to AX conditions. Similarly, in Pajani et al. (2017) the predictable alternating  
177 stimuli were presented many more times during the experiment than the unpredictable  
178 alternating stimuli, which were trial-unique. Because of this, it is unclear whether the  
179 observed effects were primarily due to effects of stimulus predictability or stimulus  
180 novelty, both of which would have similar hypothesised effects on neural responses (e.g.  
181 Feuerriegel, 2016; Mur et al., 2010; Xiang and Brown, 1998).

182 We used a similar design to investigate the interplay of stimulus repetition and  
183 prediction effects using fMRI, while controlling for the relative novelty of predictable and  
184 unpredictable alternating stimuli. The previously introduced conditions in Feuerriegel et  
185 al., (2018a) were adopted, including predictable (AB) and unpredictable (AX) alternating  
186 trials. RS was measured by comparing BOLD signals in trials with repeated and  
187 alternating stimulus pairs. Importantly, prior to the fMRI scanning session participants  
188 underwent 4 training sessions on consecutive days, during which they were presented  
189 with 6 predictable alternating face pairs (i.e. the first face of a pair was always followed by  
190 a specific same-sex face) to create specific face associations for the alternating trials.  
191 Because previous fMRI studies that presented face stimuli (Amado et al., 2016; Egner et al.,  
192 2010; Summerfield et al., 2008) found the most pronounced effects of stimulus repetition  
193 and perceptual expectations in the fusiform face area (FFA; Kanwisher et al., 1997) we  
194 focused our analyses on this region.

195 Our design allowed us to control for effects of stimulus novelty, enabling a more  
196 accurate estimate of stimulus predictability effects in repetition designs. This also allowed  
197 us to assess whether this type of expectation may account for a portion of previously  
198 observed RS effects. To foreshadow our results, we found that predictability does  
199 modulate BOLD responses in the FFA and acts primarily upon responses to alternating

200 stimuli, replicating the patterns effects in Pajani et al. (2017) and Feuerriegel et al., (2018a).  
201 While our results support the notion of separable RS and predictability effects, they also  
202 indicate that, when predictability is confounded with stimulus repetition, as in a large  
203 number of existing studies, RS effects are likely to be inflated (or perhaps even caused) by  
204 this predictability confound.

205



206

207

## 2. Methods

### 2.1 Participants

209 Twenty-two volunteers participated in the study. All were informed about the procedure  
210 of the study and gave written consent for participation beforehand. One participant was  
211 excluded due to not completing the experiment while another participant's data was  
212 partially lost due to technical issues related to the MRI scanner. The remaining 20  
213 participants (3 males; 4 left-handed) were between 19 and 28 years of age ( $M = 21.9$ ,  $SD =$   
214  $2.53$ ). All had normal or corrected-to-normal vision. The experiment was conducted in  
215 accordance with the guidelines of the Declaration of Helsinki, and with the approval of  
216 the ethics committee of the University of Jena.

### 2.2 Stimuli

218 We presented 12 images of upright female faces as stimuli. Pictures were cropped to show  
219 faces without hair or clothes, resized to 440 x 400 pixels, converted to greyscale and  
220 equated in average luminance (Fig. 1A). Stimuli were presented against a black  
221 background using Psychtoolbox v.3.0.14 (Brainard, 1997; Kleiner et al., 2007) in MATLAB  
222 2014a (The Mathworks). For each participant six stimuli were allocated randomly to be  
223 presented in the AB and the remaining six in the AX conditions.

### 2.3 Experiment Design

225 Participants first completed a series of behavioural training sessions, followed by an fMRI  
226 session (see Fig. 1C). The experimental design, including the stimuli and task, was  
227 identical across training and fMRI data acquisition sessions, except where specified  
228 otherwise.

229 In each trial (Fig. 1A) an adapter ( $S_1$ ) and test stimulus ( $S_2$ ) were each presented for  
230 250 ms, separated by an inter-stimulus interval (ISI) of 400-600 ms (randomised across  
231 trials). The image size of  $S_2$  was 20% smaller than that of  $S_1$  to avoid low-level adaptation  
232 processes. Trials were separated by an inter-trial interval (ITI): for the training sessions

233 the ITI was 1800, 2000 or 2200 ms, randomly distributed across trials, and for the fMRI  
234 sessions it was 6, 8 or 10 seconds.

235 In each trial, S<sub>1</sub> and S<sub>2</sub> could either be identical (repetition trials; Rep) or depicting  
236 different identities (alternation trials; Alt). These trial types were presented in two  
237 different contexts (Fig. 1B), labelled as “AB” and “AX”. In the AB context the S<sub>2</sub> face could  
238 either be a repetition of the S<sub>1</sub> face (Rep trials), or a specific face identity that had  
239 previously been repeatedly paired and associated with the S<sub>1</sub> identity during the training  
240 sessions (Alt trials). In these Alt trials of the AB context, each S<sub>1</sub> face identity was  
241 consistently paired with one of the five other face identities that were allocated to the AB  
242 context. Each S<sub>1</sub> identity in the AB stimulus set was paired with a different S<sub>2</sub> face  
243 identity, ensuring that each face image would be presented an equal number of times  
244 throughout the experiment. In other words, once the participant has seen a given S<sub>1</sub> face  
245 “A”, they could form expectations regarding the S<sub>2</sub> to be a repetition of face “A” or a  
246 different, specific identity “B”. In the AX context S<sub>2</sub> could either be the repetition of the S<sub>1</sub>  
247 image, or a different identity, pseudo-randomly selected from the set of 5 other face  
248 identities. Therefore, in the AX context, there were no consistent pairings between S<sub>1</sub> and  
249 S<sub>2</sub> face identities for the Alt trials: S<sub>2</sub> could be any of the five other faces, allocated to the  
250 AX condition, ensuring that each face appeared the same number of times throughout  
251 this condition. This procedure ensured further that each AB and AX face identity was  
252 presented the same number of times across the experiment. Thus altogether, we had two  
253 independent factors: trial type (Rep or Alt) and context, reflecting prior associations  
254 formed for Alt trials (AB) or not having such transitional rules (AX). The proportion of  
255 Rep trials (i.e., the probability of stimulus repetition) was 50% in both AB and AX  
256 contexts.

257

258

259

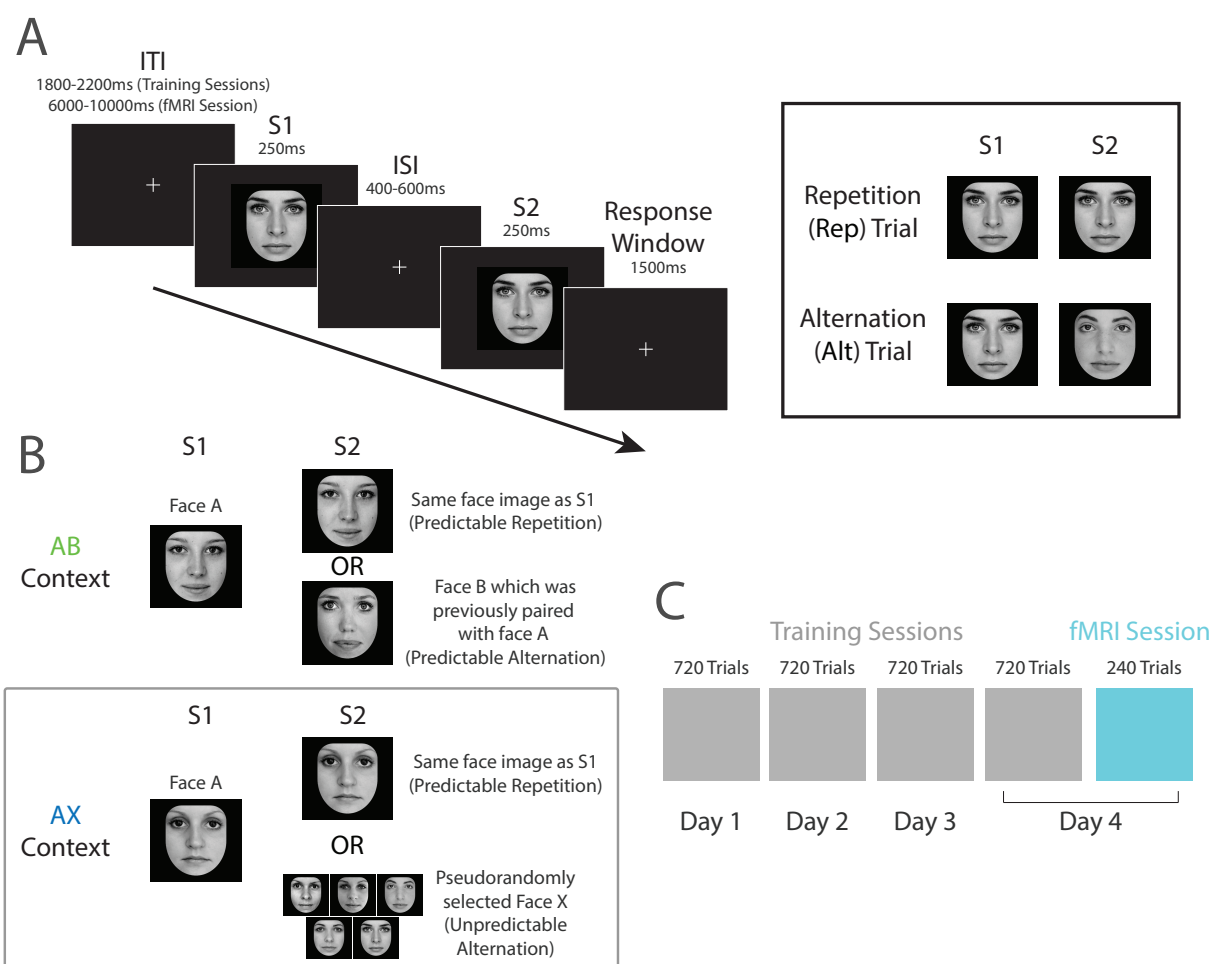

260  
261  
262 *Figure 1.* Trial structure and predictability cueing manipulation. A) In each trial S<sub>1</sub> and S<sub>2</sub>  
263 face stimuli were presented, separated by a 400-600 ms inter-stimulus interval (ISI). The  
264 S<sub>2</sub> stimulus could either be the same face image as S<sub>1</sub> (repetition trials) or a different  
265 female face (alternation trials). B) For alternation trials, the S<sub>2</sub> face could either be a  
266 particular face “B” that was repeatedly paired with a specific S<sub>1</sub> face “A” during the training  
267 sessions (AB context) or pseudorandomly-chosen from a set of 5 different faces (AX  
268 context). The probability of stimulus repetition was fixed at 50% across both contexts. C)  
269 Participants completed 4 training sessions over consecutive days. Trial structure, task  
270 (same-different forced choice), stimuli and AB/AX contexts were the same as in the fMRI  
271 scanning session but with a shorter ITI duration. Following the fourth training session  
272 participants then completed the fMRI session on the same day.

274

## 275 **2.4 Procedure**

276 Participants completed four training sessions across four consecutive days prior to the  
277 fMRI measurements. The fMRI session followed the last training session immediately on  
278 the fourth day. Each training session was composed of twelve blocks (60 trials per block,  
279 720 trials per session) and lasted approximately 40 minutes. All sessions took place at  
280 approximately the same time of the day, in the afternoon hours to control for potential  
281 changes of attention that occur across the circadian cycle (Valdez et al., 2010).

282 During the training sessions participants learned the  $S_1$ - $S_2$  transition probabilities  
283 associated with face identities in the AB and AX contexts. Trials of AB and AX context  
284 were presented randomly interleaved within the same blocks of trials and with equal  
285 probability. For the AB context, each face image pairing (in Alt trials) was presented 120  
286 times throughout the training sessions while for the AX context each of the possible Alt  
287  $S_1$ - $S_2$  combinations was shown 24 times.

288 During the training and fMRI sessions the participants' task was to decide whether  
289 the  $S_1$  and  $S_2$  were the same or different face images by pressing one of two keys on a  
290 keyboard (training session) or MRI-compatible button box (fMRI session). The spatial  
291 layout of response keys/buttons and associated response fingers were kept constant across  
292 behavioural and fMRI sessions. Instructions were presented in the centre of the screen  
293 prior to each run. Participants took a self-paced break between each run. The entire fMRI  
294 session lasted approximately 60 min.

## 295 **2.5 Image Acquisition**

296 Four experimental runs were completed, with each lasting for about 10 minutes and  
297 including 60 trials. A total of 240 trials were presented during the fMRI session. An  
298 additional localizer sequence was included to define the location of the FFA bilaterally  
299 (blocks of 40 images, size: 600 x 600 pixels on a grey background; exposition time: 300 ms,  
300 ISI: 200 ms; presenting faces, objects and Fourier-randomized noise patterns lasting for 20  
301 seconds each). Using data from the localizer sequence we could identify the right FFA in

302 18 out of 20 participants (average MNI coordinates ( $\pm$  SE): 41 (1), -47 (1), -21 (1)). We could  
303 also define the left FFA in a subset of 14 participants (average MNI coordinates: -40 (1), -51  
304 (2), -21 (1);  $p < 0.05$  FWE) and included this ROI in a separate analysis.

305 Magnetic Resonance Images were acquired using a 3-Tesla magnetic resonance  
306 (MR) scanner from Siemens. For functional images, a standard  $T_2$ -weighted echo-planar  
307 imaging (EPI) sequence (35 slices,  $10^\circ$  tilted relative to axial, TR = 2000 ms, echo time (TE)  
308 = 30 ms, flip angle  $90^\circ$ , 64 x 64 matrices, in plane resolution 3 mm isotopic voxel size) was  
309 used. A high resolution  $T_1$ -weighted structural 3D scan was generated using a  
310 magnetization-prepared rapid gradient-echo (MP-RAGE; TR = 2300 ms; TE = 3.03 ms; 1  
311 mm isotropic voxel size). For details of pre-processing and statistical analysis see Cziraki  
312 et al., (2010). Briefly, the functional images were realigned, normalized to the MNI-152  
313 space, resampled to  $2 \times 2 \times 2$  mm resolution and spatially smoothed with a Gaussian kernel  
314 of 8 mm FWHM (SPM12, Wellcome Department of Imaging Neuroscience, London, UK). A  
315 generalised linear model was specified, using the different conditions, as well as six  
316 movement parameters. Data from the localizer sequence were used to identify the  
317 location of the FFA individually by contrasting faces with objects and noise. From these  
318 coordinates the BOLD signal due to the experimental conditions was extracted using a 2  
319 mm radius sphere, and the peak values were entered into the statistical models.

## 320 **2.6 Statistical Analyses**

321 Data and code required to reproduce all analyses will be available at <https://osf.io/akygb/>  
322 at the time of publication. Statistical analyses were performed using Statistica (StatSoft)  
323 and JASP v0.9.1 (JASP Team). Mean response times and accuracy rates during the training  
324 sessions were analysed using 4 x 2 x 2 repeated measures ANOVAs with the factors of  
325 session (1, 2, 3, 4), context (AB, AX) and trial type (Rep, Alt). Peak BOLD signal values  
326 were analysed using a 2 x 2 repeated measures ANOVA with the factors context (AB, AX)  
327 and trial type (Rep, Alt). For all ANOVA models, Greenhouse-Geisser corrections were  
328 applied in cases where Mauchly tests indicated violations of sphericity. Additionally, we  
329 analysed the mean response times and accuracy rates for the fMRI session.

## 330 **3. Results**

### 331 **3.1 Behavioral Results**

332 A significant main effect of session was found for response times. Because the Mauchly  
333 test of sphericity revealed unequal variances of differences in the four-level factor session  
334 ( $\chi^2(5) = 29.85, p < 0.001$ ), Greenhouse-Geisser corrected values are reported ( $F_{(1.37, 21.96)} =$   
335  $28.21, p < 0.001, \eta_p^2 = 0.64$ ). Participants gradually became faster at responding across  
336 sessions, with significant differences between session 1 ( $M = 647$  ms,  $SE = 57$  ms) and  
337 session 2 ( $M = 583$  ms,  $SE = 48$  ms;  $p < 0.001$ ), session 2 and session 3 ( $M = 552$  ms,  $SE = 48$   
338 ms;  $p = 0.006$ ) as well as session 3 and session 4 ( $M = 533$  ms,  $SE = 44$  ms;  $p = 0.017$ ). There  
339 was also a main effect of trial type ( $F_{(1,16)} = 27.46, p < 0.001, \eta_p^2 = 0.63$ ). Participants  
340 responded faster in Rep trials ( $M = 560$  ms,  $SE = 68$  ms) as compared to Alt trials ( $M = 598$   
341 ms,  $SE = 66$  ms), showing a behavioural priming effect (Olkkonen et al., 2017). For  
342 response times no other main effects or interactions were statistically significant.

343 The analysis of reaction times during the scanning session revealed no significant  
344 effects. Only a tendency for a faster reaction to repetition trials ( $M = 545$  ms,  $SE = 24$  ms)  
345 compared to alternation trials ( $M = 562$  ms,  $SE = 19$  ms;  $F_{(1,19)} = 3.47, p = 0.078, \eta_p^2 = 0.15$ )  
346 could be found. Descriptive data showed that response times during the scanning session  
347 ( $M = 553$  ms,  $SE = 23$  ms) were comparable to those from the third and fourth training  
348 sessions.

349 Analyses of accuracy rates during the training blocks revealed a main effect of trial  
350 type ( $F_{(1,16)} = 4.52, p = .049, \eta_p^2 = 0.22$ ) with a small performance advantage for repetition  
351 ( $M = 95.9\%$ ,  $SE = 2.3\%$ ) than for alternation trials ( $M = 93.8\%$ ,  $SE = 2.9\%$ ). No other main  
352 effects or interactions were statistically significant. The results of the scanning session did  
353 not show any significant effects (all  $p$ 's  $> .5$ ). Still, the overall performance ( $M = 95.2\%$ ,  $SE$   
354  $= 1.3\%$ ) showed that participants performed the task correctly.

### 355 **3.2 Neuroimaging Results**

356 Peak BOLD signal amplitudes by participant and condition are displayed in Figure 2A. We  
357 performed a two-by-two repeated measures ANOVA with factors context (AB, AX) and  
358 trial type (Rep, Alt) on peak BOLD signals in the right FFA (data shown in Fig 2.). There  
359 was a significant RS effect; stimuli in Rep trials evoked smaller BOLD signals ( $M = 0.65$   
360 percent signal change,  $SE = 0.08$ ) compared to those in Alt trials ( $M = 0.71$ ,  $SE = 0.08$ ; main  
361 effect of trial type,  $F_{(1,17)} = 17.65, p < 0.001, \eta_p^2 = 0.51$ ).

362 We also found an interaction between context and trial type in the rFFA ( $F_{(1,17)} =$   
363  $5.49, p = 0.032, \eta_p^2 = 0.24$ ). Plotting this interaction effect revealed larger RS magnitude in  
364 the AX context (mean repetition – alternation difference =  $-0.095$ ,  $SE = 0.022$ ) as  
365 compared to the AB context ( $M = -0.022$ ,  $SE = 0.020$ , shown in Fig 2B). Additionally, there  
366 appeared to be a larger magnitude effect of context on Alt trials, with AX Alt trials evoking  
367 larger BOLD signals than AB trials (mean AB – AX context effect =  $-0.046$ ,  $SE = 0.018$ ). In  
368 contrast, BOLD signals for AB and AX Rep trial differences did not differ as much ( $M =$   
369  $0.027$ ,  $SE = 0.020$ ). Altogether, these results suggest that the extent of the observed RS  
370 largely depends on the signal magnitude of the Alt trials and this, in turn, is reduced by  
371 prior associations of S1 and S2.

372 As we could not identify the left FFA using our localiser sequences in a subset of  
373 participants, we included this ROI in an additional analysis. We found an RS effect (main  
374 effect of trial type,  $F_{(1,13)} = 10.0, p = 0.007, \eta_p^2 = 0.44$ ). The interaction effect was the same  
375 pattern as found for the rFFA, but did not quite meet our statistical significance threshold  
376 ( $F_{(1,13)} = 4.36, p = 0.057, \eta_p^2 = 0.25$ ).

377 Notably, we did not observe statistically significant RS effects in our sample in the  
378 AB context, for the right FFA ( $t(17) = -1.10$ ,  $p = 0.287$ ) or left FFA ( $t(14) = -0.23$ ,  $p = 0.819$ ,  
379 mean Rep – Alt difference =  $-0.004$ ,  $SE = 0.019$ ), whereas we did find significant RS effects  
380 in the AX context (right FFA:  $-4.31$ ,  $p < .001$ ; left FFA:  $t(14) = -3.49$ ,  $p = 0.004$ ,  $M = -0.094$ ,  
381  $SE = 0.027$ ).

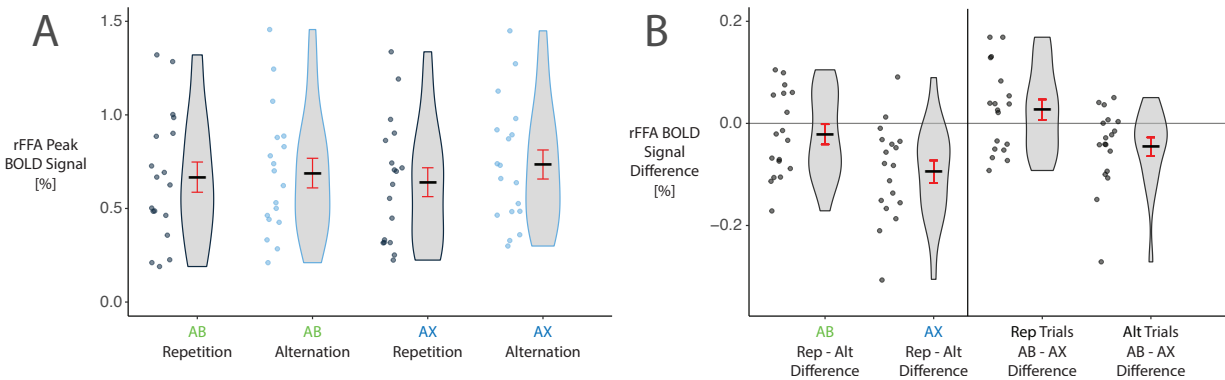

382  
383 *Figure 2.* BOLD signal results for the right FFA. A) Peak BOLD signals for each Rep/Alt  
384 and AB/AX condition. Dots represent individual data points. Black lines represent group  
385 means. Error bars depict standard errors of the mean. Shaded areas depict the  
386 distributions of data for each condition. B) Repetition and context effects. Repetition  
387 effect (Rep – Alt) magnitudes for each context are shown in the left panel. Differences in  
388 BOLD signals by AB/AX context are displayed for repetition and alternation trials in the  
389 right panel.

#### 390 4. Discussion

391 To investigate the interplay between repetition and expectation effects, we presented  
392 pairs of faces which could either repeat or alternate within a trial, in two different  
393 contexts. In one context the alternating faces were chosen randomly and were therefore  
394 unpredictable, while in the other context the second face in alternating trials could be  
395 predicted after seeing the first, due to previously learned transitional rules and  
396 contingencies. In both contexts the repeated stimuli were predictable. We found  
397 repetition-related reductions of BOLD signals in the left and right FFA, consistent with a  
398 large body of work (for a review see Grill-Spector et al., 2006). More importantly, we



399 report that responses to alternating stimuli differed markedly depending on the context;  
400 unpredictable stimulus pairs (in the AX context) evoked larger BOLD signals than those  
401 which were predictable (in the AB context). This in turn modulated the measured  
402 repetition-alternation signal differences that typically defines the measurement of RS, and  
403 even determined whether or not we found statistically-significant RS effects in our  
404 sample. Here, the point estimate of RS magnitude in the right FFA was over four times as  
405 large in the AX ( $M = 0.095$ ) compared to AB ( $M = 0.022$ ) contexts. Our results  
406 demonstrate that stimulus predictability effects can substantially inflate conventional  
407 measures of RS, or even mimic the effect of stimulus repetition, when predictability is not  
408 equated between repeated and alternating stimuli. While it seems unlikely that all prior  
409 reports of RS could be fully explained by effects of stimulus predictability, this effect has  
410 likely inflated repetition effect sizes in a large number of existing studies.

411 Our results are in line with those of Pajani et al., (2017) and (Feuerriegel et al.,  
412 2018a), who found similar effects of stimulus predictability using BOLD and ERP  
413 measures, respectively. Importantly, our design also controlled for effects of stimulus  
414 novelty across predictable and unpredictable contexts, which could have produced the  
415 patterns of effects seen in their experiments (Mur et al., 2010; Xiang and Brown, 1998). In  
416 their studies the alternating stimuli in AB-type conditions were presented many times to  
417 the participants, yet the alternating stimuli in AX-type conditions were presented much  
418 more rarely (Feuerriegel et al., 2018a) or only once in the experiment (Pajani et al., 2017).  
419 By contrast, we presented each face image in the AB and AX contexts an equal number of  
420 times, thereby replicating their findings while controlling for effects of novelty.

421 Notably, effects of stimulus predictability seem to be consistent across  
422 hemodynamic and electrophysiological measures, in contrast to effects of repetition  
423 probability manipulations as used in Summerfield et al. (2008) and subsequent  
424 replications. The effects of stimulus predictability seen here resemble expectations  
425 derived through statistical learning of image transition probabilities (as seen in single-cell  
426 recording measurements by Meyer & Olson, 2011), produced by the pairing of specific  
427 images, rather than more abstract expectations about whether a stimulus will repeat or

428 not. These types of expectations appear to be qualitatively different to expectations  
429 pertaining to more abstract sequences of stimuli, and there is some evidence that these  
430 two have interacting effects on neural responses (Costa-Faidella et al., 2011; Feuerriegel et  
431 al., 2018b; Mittag et al., 2016).

432         Similar to the EEG study of Feuerriegel and colleagues (2018a), we observed that  
433 these context effects predominantly acted upon responses to alternating rather than  
434 repeated stimuli. This indicates that stimulus predictability selectively influenced  
435 responses to alternating stimuli, which does not modulate the underlying mechanisms of  
436 RS per se, but does influence how it is measured in commonly-used immediate repetition  
437 designs (Grill-Spector et al., 2006). This pattern of results also suggests that the violation  
438 of image-specific expectations (i.e., surprise) may underlie the observed predictability  
439 effects, and be responsible for BOLD signal increases in AX alternating trials. In our  
440 design, the likelihood of each trial type (AB-Rep, AB-Alt, AX-Rep and AX-Alt) was  
441 equated throughout the experiment. However, the relative likelihoods of the appearance  
442 of specific face images in each context were not. For example, in AB trials the S<sub>2</sub> face  
443 could either be a repetition of S<sub>1</sub>, or a specific different face identity, with a probability  
444 ratio of 1:1. In contrast, after seeing S<sub>1</sub> in the AX trials, an image repetition would occur  
445 50% of the time, yet each of the 5 possible alternating face images could each appear with  
446 a probability of 10%, leading to a probability ratio of 5:1. If participants' expectations  
447 depended on the relative appearance probabilities of specific images, then this would lead  
448 to expectations more strongly weighted toward repetitions in AX contexts, and larger  
449 surprise-related BOLD increases following AX alternating stimuli. According to this  
450 interpretation, one might also expect to see similar magnitude suppression of BOLD  
451 signals for AX repetition trials, reflecting ES, whereas we observed larger context effects  
452 for alternating trials. This may be because surprise seems to have a larger effect on neural  
453 responses than fulfilled expectations (Amado et al., 2016; Kovács and Vogels, 2014). In  
454 addition, there is evidence that effects of fulfilled expectations and surprise are  
455 diminished for repeated stimuli (reviewed in Feuerriegel et al., 2018b). So, it appears that  
456 surprise-related response enhancement in AX alternating trials may have played an  
457 important role in inflating measures of RS.

458           We caution that our findings should not be interpreted as that repetition effects in  
459 general are simply due to a stimulus predictability effect. Previous experiments using AB-  
460 type designs and stimulus associations have reported repetition effects (Todorovic and de  
461 Lange, 2012; Pajani et al., 2017; Feuerriegel et al., 2018a, 2019). In fact, one of the earliest  
462 mentions of RS in macaques was from the seminal study of Gross and colleagues (1979),  
463 using an AB-type design, with associated stimuli and an S<sub>1</sub>-S<sub>2</sub> matching task.

464           In addition, we note that the RS effects in our study may not be strictly localized to  
465 the FFA, and may partly index inherited effects due to RS in regions early in the visual  
466 stream, such as V<sub>1</sub>, providing altered input to higher-level regions. Such ‘inherited  
467 adaptation’ effects (Kohn, 2007) have been widely documented (reviewed in Feuerriegel,  
468 2016; Larsson, Solomon, & Kohn, 2016) and small size changes between S<sub>1</sub> and S<sub>2</sub> would  
469 not fully control for such effects, given the large receptive field sizes that are present in  
470 areas earlier than the FFA in the visual hierarchy. A recent optogenetic study has cast  
471 doubt on the notion that RS is locally generated in IT (Fabbrini et al., 2019), and so it  
472 remains to be seen what the magnitude of RS effects would be when controlling for both  
473 inherited adaptation and stimulus predictability. An investigation of RS in this context  
474 should aim for higher precision (i.e., more trials per participant, or a larger sample size)  
475 than in the current study and most previous studies of RS. This is because RS, which is  
476 usually a very robust effect, was not even statistically significant in the AB context in our  
477 sample, suggesting that the true magnitudes of ‘true’ RS effects may be much smaller than  
478 previously assumed.

479           While our findings do not provide strong evidence for or against predictive coding  
480 models that incorporate the notion of sensory precision (e.g., Auksztulewicz and Friston,  
481 2016), it does appear that expectations can account for a proportion of repetition effects  
482 observed in many experiments. Results of recent experiments have not provided clear  
483 support for precision-based predictive coding models of RS (e.g. Amado et al., 2016;  
484 Rostalski et al., 2019; Vinken et al., 2018) and further tests of key model predictions are  
485 needed. While RS can be conceptualized as reflecting a strong prior belief towards stimuli

486 encountered in the immediate past, it is still unclear exactly how RS fits within the  
487 broader taxonomy of expectation-related phenomena.

488 Our results should be interpreted with the following caveats in mind. First of all,  
489 our study used an immediate repetition design, and our results may not be generalizable  
490 to RS as measured using delayed repetition paradigms, in which a number of different  
491 intervening stimuli are presented between the first and repeated presentations of a given  
492 image (reviewed in Henson, 2016). Although predictive coding models encompass both  
493 types of repetition effects (e.g., Auksztulewicz and Friston, 2016) it is likely that these rely  
494 on different sets of neural mechanisms (Epstein et al., 2008; Weiner et al., 2010). It  
495 remains unclear whether these should be captured within a unifying framework, or if  
496 different sets of underlying mechanisms produce similar effects in each type of repetition  
497 design.

498 Second, we did not find differences in mean RTs and accuracy scores across AB and  
499 AX conditions, despite extensive training and exposure to the stimulus pairings. This is  
500 despite our findings of stimulus repetition effects on RTs. Because of this, it is unclear  
501 whether the predictability effects found in our neuroimaging results were actually used for  
502 decision making during the task. Although validly-cued expectancies for certain stimuli  
503 have led to faster responses in previous studies (Hall et al., 2018; Mulder et al., 2012), these  
504 designs have typically conflated expectations to see a certain stimulus with preparation of  
505 motor actions corresponding to that stimulus (Gold and Stocker, 2017). In addition, recent  
506 findings have cast doubt on the idea that contextual expectations affect those sensory  
507 representations that are used for perceptual decision making, at least in the same trials  
508 whereby those expectations are fulfilled or violated, and when controlling for feature-  
509 selective attention (Bang and Rahnev, 2017; Rungratsameetaweemana et al., 2018). In our  
510 task there were no cued biases toward a particular button response, and participants'  
511 expectations for how to respond were balanced across AB and AX contexts. This may be  
512 why we did not observe predictability effects on behavior.

513

## 5. Conclusion

514 We have shown that, in immediate repetition designs, an observer's capacity to predict  
515 the image of repeated compared to unrepeated stimuli has a substantial effect on the  
516 observed magnitude of RS. While this does not necessarily mean that RS is best accounted  
517 for by predictive coding models, it does indicate that measures of repetition effects have  
518 likely been inflated due to this confound in a very large number of previous studies,  
519 including those run within our own labs. We also highlight stimulus predictability as an  
520 important, yet commonly overlooked, factor to consider when investigating the hierarchy  
521 of expectation effects implemented within the visual system.

522

523 **Acknowledgements:** The authors would like to thank Carolin Altmann for providing the  
524 stimulus set. This work was supported by a grant from the Deutsche  
525 Forschungsgemeinschaft (KO3918/5-1).

526

527

528

## References

529

- 530 Amado, C., Hermann, P., Kovács, P., Grotheer, M., Vidnyánszky, Z., Kovács, G., 2016. The  
531 contribution of surprise to the prediction based modulation of fMRI responses.  
532 *Neuropsychologia* 84, 105–112. <https://doi.org/10.1016/j.neuropsychologia.2016.02.003>
- 533 Auksztulewicz, R., Friston, K., 2016. Repetition suppression and its contextual determinants in  
534 predictive coding. *Cortex* 80, 125–140. <https://doi.org/10.1016/j.cortex.2015.11.024>
- 535 Bang, J.W., Rahnev, D., 2017. Stimulus expectation alters decision criterion but not sensory  
536 signal in perceptual decision making. *Sci. Rep.* 7, 17072. <https://doi.org/10.1038/s41598-017-16885-2>
- 537
- 538 Brainard, D.H., 1997. The Psychophysics Toolbox. *Spat. Vis.* 10, 433–436.  
539 <https://doi.org/10.1163/156856897X00357>
- 540 Costa-Faidella, J., Grimm, S., Slabu, L., Díaz-Santaella, F., Escera, C., 2011. Multiple time scales  
541 of adaptation in the auditory system as revealed by human evoked potentials.  
542 *Psychophysiology* 48, 774–783. <https://doi.org/10.1111/j.1469-8986.2010.01144.x>
- 543 Cziraki, C., Greenlee, M.W., Kovacs, G., 2010. Neural correlates of high-level adaptation-related  
544 aftereffects. *J. Neurophysiol.* 103, 1410–1417. <https://doi.org/10.1152/jn.00582.2009>
- 545 De Gardelle, V., Waszczuk, M., Egner, T., Summerfield, C., 2013. Concurrent repetition  
546 enhancement and suppression responses in extrastriate visual cortex. *Cereb. Cortex* 23,  
547 2235–2244. <https://doi.org/10.1093/cercor/bhs211>
- 548 Dhruv, N.T., Tailby, C., Sokol, S.H., Lennie, P., 2011. Multiple adaptable mechanisms early in  
549 the primate visual pathway. *J. Neurosci.* 31, 15016–15025.  
550 <https://doi.org/10.1523/jneurosci.0890-11.2011>
- 551 Eger, E., 2004. BOLD repetition decreases in object-responsive ventral visual areas depend on  
552 spatial attention. *J. Neurophysiol.* 92, 1241–1247. <https://doi.org/10.1152/jn.00206.2004>
- 553 Egner, T., Monti, J.M., Summerfield, C., 2010. Expectation and surprise determine neural  
554 population responses in the ventral visual stream. *J. Neurosci.* 30, 16601–16608.  
555 <https://doi.org/10.1523/JNEUROSCI.2770-10.2010>
- 556 Epstein, R.A., Parker, W.E., Feiler, A.M., 2008. Two kinds of fMRI repetition suppression?  
557 Evidence for dissociable neural mechanisms. *J. Neurophysiol.* 99, 2877–2886.  
558 <https://doi.org/10.1152/jn.90376.2008>
- 559 Fabbrini, F., Van den Haute, C., De Vitis, M., Baekelandt, V., Vanduffel, W., Vogels, R., 2019.  
560 Probing the mechanisms of repetition suppression in inferior temporal cortex with  
561 optogenetics. *Curr. Biol.* 29, 1988–1998.e4. <https://doi.org/10.1016/J.CUB.2019.05.014>
- 562 Feldman, H., Friston, K.J., 2010. Attention, uncertainty, and free-energy. *Front. Hum. Neurosci.*  
563 4, 1–23. <https://doi.org/10.3389/fnhum.2010.00215>
- 564 Feuerriegel, D., 2016. Selecting appropriate designs and comparison conditions in repetition

- 565 paradigms. *Cortex* 80, 196–205. <https://doi.org/10.1016/j.cortex.2015.10.022>
- 566 Feuerriegel, D., Churches, O., Coussens, S., Keage, H.A.D., 2019. Temporal expectations  
567 modulate face image repetition suppression of early stimulus evoked event-related  
568 potentials. *Neuropsychologia* 122, 76–87.  
569 <https://doi.org/10.1016/j.neuropsychologia.2018.11.010>
- 570 Feuerriegel, D., Churches, O., Coussens, S., Keage, H.A.D., 2018a. Evidence for  
571 spatiotemporally distinct effects of image repetition and perceptual expectations as  
572 measured by event-related potentials. *Neuroimage* 169, 94–105.  
573 <https://doi.org/10.1016/j.neuroimage.2017.12.029>
- 574 Feuerriegel, D., Keage, H.A.D., Rossion, B., Quek, G.L., 2018b. Immediate stimulus repetition  
575 abolishes stimulus expectation and surprise effects in fast periodic visual oddball designs.  
576 *Biol. Psychol.* 138, 110–125. <https://doi.org/10.1016/j.biopsycho.2018.09.002>
- 577 Fiser, J., Aslin, R., 2002. Statistical learning of new visual feature combinations by infants. *Proc.*  
578 *Natl. Acad. Sci. U. S. A.* 99, 15822–6. <https://doi.org/10.1073/pnas.232472899>
- 579 Friston, K., 2005. A theory of cortical responses. *Philos. Trans. R. Soc. B Biol. Sci.* 360, 815–  
580 836. <https://doi.org/10.1098/rstb.2005.1622>
- 581 Gold, J.I., Stocker, A.A., 2017. Visual decision-making in an uncertain and dynamic world.  
582 *Annu. Rev. Vis. Sci.* 3, 227–250. <https://doi.org/10.1146/annurev-vision-111815-114511>
- 583 Grill-Spector, K., Henson, R., Martin, A., 2006. Repetition and the brain: Neural models of  
584 stimulus-specific effects. *Trends Cogn. Sci.* 10, 14–23.  
585 <https://doi.org/10.1016/j.tics.2005.11.006>
- 586 Gross, C.G., Bender, D.B., Gerstein, G.L., 1979. Activity of inferior temporal neurons in  
587 behaving monkeys. *Neuropsychologia* 17, 215–229. [https://doi.org/10.1016/0028-  
588 3932\(79\)90012-5](https://doi.org/10.1016/0028-3932(79)90012-5)
- 589 Grotheer, M., Hermann, P., Vidnyánszky, Z., Kovács, G., 2014. Repetition probability effects for  
590 inverted faces. *Neuroimage* 102, 416–423.  
591 <https://doi.org/10.1016/j.neuroimage.2014.08.006>
- 592 Grotheer, M., Kovacs, G., 2014. Repetition probability effects depend on prior experiences. *J.*  
593 *Neurosci.* 34, 6640–6646. <https://doi.org/10.1523/JNEUROSCI.5326-13.2014>
- 594 Grotheer, M., Kovács, G., 2015. The relationship between stimulus repetitions and fulfilled  
595 expectations. *Neuropsychologia* 67, 175–182.  
596 <https://doi.org/10.1016/j.neuropsychologia.2014.12.017>
- 597 Hall, M.G., Mattingley, J.B., Dux, P.E., 2018. Electrophysiological correlates of incidentally  
598 learned expectations in human vision. *J. Neurophysiol.* 119, 1461–1470.  
599 <https://doi.org/10.1152/jn.00733.2017>
- 600 Henson, R.N., 2016. Repetition suppression to faces in the fusiform face area: A personal and  
601 dynamic journey. *Cortex* 80, 174–184. <https://doi.org/10.1016/j.cortex.2015.09.012>
- 602 Kaliukhovich, D.A., Vogels, R., 2016. Divisive normalization predicts adaptation-induced  
603 response changes in macaque inferior temporal cortex. *J. Neurosci.* 36, 6116–6128.

- 604 <https://doi.org/10.1523/jneurosci.2011-15.2016>
- 605 Kaliukhovich, D.A., Vogels, R., 2014. Neurons in macaque inferior temporal cortex show no  
606 surprise response to deviants in visual oddball sequences. *J. Neurosci.* 34, 12801–12815.  
607 <https://doi.org/10.1523/jneurosci.2154-14.2014>
- 608 Kaliukhovich, D.A., Vogels, R., 2011. Stimulus repetition probability does not affect repetition  
609 suppression in macaque inferior temporal cortex. *Cereb. Cortex* 21, 1547–1558.  
610 <https://doi.org/10.1093/cercor/bhq207>
- 611 Kanwisher, N., McDermott, J., Chun, M.M., 1997. The fusiform face area: A module in human  
612 extrastriate cortex specialized for face perception. *J. Neurosci.* 17, 4302–11.  
613 <https://doi.org/10.1098/Rstb.2006.1934>
- 614 Kleiner, M., Brainard, D., Pelli, D., Ingling, A., Murray, R., Broussard, C., 2007. What’s new in  
615 Psychtoolbox-3. *Perception*, 36.
- 616 Kronbichler, L., Said-yürekli, S., Kronbichler, M., 2018. Perceptual expectations of object stimuli  
617 modulate repetition suppression in a delayed repetition design. *Sci. Rep.* 8, 1–8.  
618 <https://doi.org/10.1038/s41598-018-31091-4>
- 619 Larsson, J., Smith, A.T., 2012. fMRI Repetition suppression : Neuronal adaptation or stimulus  
620 expectation? *Cereb. Cortex* 22, 567–576. <https://doi.org/10.1093/cercor/bhr119>
- 621 Larsson, J., Solomon, S.G., Kohn, A., 2016. fMRI adaptation revisited. *Cortex* 80, 154–160.  
622 <https://doi.org/10.1016/j.cortex.2015.10.026>
- 623 Mayrhauser, L., Bergmann, J., Crone, J., Kronbichler, M., 2014. Neural repetition suppression:  
624 Evidence for perceptual expectation in object-selective regions. *Front. Hum. Neurosci.* 8, 1–  
625 8. <https://doi.org/10.3389/fnhum.2014.00225>
- 626 Meyer, T., Olson, C.R., 2011. Statistical learning of visual transitions in monkey inferotemporal  
627 cortex. *Proc. Natl. Acad. Sci.* 108, 19401–19406. <https://doi.org/10.1073/pnas.1112895108>
- 628 Mittag, M., Takegata, R., Winkler, I., 2016. Transitional probabilities are prioritized over  
629 stimulus/pattern probabilities in auditory deviance detection: Memory basis for predictive  
630 sound processing. *J. Neurosci.* 36, 9572–9. [https://doi.org/10.1523/JNEUROSCI.1041-  
631 16.2016](https://doi.org/10.1523/JNEUROSCI.1041-16.2016)
- 632 Mulder, M.J., Wagenmakers, E.-J., Ratcliff, R., Boekel, W., Forstmann, B.U., 2012. Bias in the  
633 brain: A diffusion model analysis of prior probability and potential payoff. *J. Neurosci.* 32,  
634 2335–43. <https://doi.org/10.1523/JNEUROSCI.4156-11.2012>
- 635 Mur, M., Ruff, D.A., Bodurka, J., Bandettini, P.A., Kriegeskorte, N., 2010. Face-identity change  
636 activation outside the face system: “Release from adaptation” may not always indicate  
637 neuronal selectivity. *Cereb. Cortex* 20, 2027–2042. <https://doi.org/10.1093/cercor/bhp272>
- 638 Murray, S.O., Wojciulik, E., 2004. Attention increases neural selectivity in the human lateral  
639 occipital complex. *Nat. Neurosci.* 7, 70–74. <https://doi.org/10.1038/nn1161>
- 640 Olkkonen, M., Aguirre, G.K., Epstein, R.A., 2017. Expectation modulates repetition priming  
641 under high stimulus variability. *J. Vis.* 17, 1–16. <https://doi.org/10.1167/17.6.10>
- 642 Pajani, A., Kouider, S., Roux, P., de Gardelle, V., 2017. Unsuppressible repetition suppression



- 643 and exemplar-specific expectation suppression in the Fusiform Face Area. *Sci. Rep.* 7, 160.  
644 <https://doi.org/10.1038/s41598-017-00243-3>
- 645 Rao, R.P.N., Ballard, D.H., 1999. Predictive coding in the visual cortex: A functional  
646 interpretation of some extra-classical receptive-field effects. *Nat. Neurosci.* 2, 79–87.  
647 <https://doi.org/10.1038/4580>
- 648 Romberg, A.R., Saffran, J.R., 2011. Statistical learning and language acquisition. *Wiley*  
649 *Interdiscip. Rev. Cogn. Sci.* 1, 906–914. <https://doi.org/10.1002/wcs.78>.Statistical
- 650 Rostalski, S.-M., Amado, C., Kovács, G., 2019. Repetition suppression for noisy and intact faces  
651 in the occipito-temporal cortex. *Front. Psychol.* 10, 1348.  
652 <https://doi.org/10.3389/fpsyg.2019.01348>
- 653 Rungratsameetaweemana, N., Itthipuripat, S., Salazar, A., Serences, J.T., 2018. Expectations do  
654 not alter early sensory processing during perceptual decision-making. *J. Neurosci.* 38, 5632–  
655 5648. <https://doi.org/10.1523/JNEUROSCI.3638-17.2018>
- 656 Solomon, S.G., Kohn, A., 2014. Moving sensory adaptation beyond suppressive effects in single  
657 neurons. *Curr. Biol.* 24, R1012–R1022. <https://doi.org/10.1016/j.cub.2014.09.001>
- 658 Summerfield, C., Egner, T., 2009. Expectation (and attention) in visual cognition. *Trends Cogn.*  
659 *Sci.* 13, 403–409. <https://doi.org/10.1016/j.tics.2009.06.003>
- 660 Summerfield, C., Trittschuh, E.H., Monti, J.M., Mesulam, M.-M., Egner, T., 2008. Neural  
661 repetition suppression reflects fulfilled perceptual expectations. *Nat. Neurosci.* 11, 1004–  
662 1006. <https://doi.org/10.1038/nn.2163>
- 663 Summerfield, C., Wyart, V., Johnen, V.M., de Gardelle, V., 2011. Human scalp  
664 electroencephalography reveals that repetition suppression varies with expectation. *Front.*  
665 *Hum. Neurosci.* 5, 1–13. <https://doi.org/10.3389/fnhum.2011.00067>
- 666 Todorovic, A., de Lange, F.P., 2012. Repetition suppression and expectation suppression are  
667 dissociable in time in early auditory evoked fields. *J. Neurosci.* 32, 13389–13395.  
668 <https://doi.org/10.1523/JNEUROSCI.2227-12.2012>
- 669 Turk-Browne, N.B., Scholl, B.J., Chun, M.M., Johnson, M.K., 2009. Neural evidence of  
670 statistical learning: Efficient detection of visual regularities without awareness. *J. Cogn.*  
671 *Neurosci.* 21, 1934–45. <https://doi.org/10.1162/jocn.2009.21131>
- 672 Valdez, P., Ramírez, C., García, A., Talamantes, J., Cortez, J., 2010. Circadian and homeostatic  
673 variation in sustained attention. *Chronobiol. Int.* 27, 393–416.  
674 <https://doi.org/10.3109/07420521003765861>
- 675 Vinken, K., Op de Beeck, H., Vogels, R., 2018. Face repetition probability does not Affect  
676 repetition suppression in macaque inferotemporal cortex. *J. Neurosci.* 0462–18.  
677 <https://doi.org/10.1523/JNEUROSCI.0462-18.2018>
- 678 Weiner, K.S., Sayres, R., Vinberg, J., Grill-Spector, K., 2010. fMRI-Adaptation and category  
679 selectivity in human ventral temporal cortex: Regional differences across time scales. *J.*  
680 *Neurophysiol.* 103, 3349–3365. <https://doi.org/10.1152/jn.01108.2009>
- 681 Xiang, J., Brown, M.W., 1998. Differential neuronal encoding of novelty, familiarity and recency

682 in regions of the anterior temporal lobe. *Neuropharmacology* 37, 657–676.

683
